# Supplementary material for: Food insecurity, SNAP participation and glycemic control in low-income adults with predominantly type 2 diabetes: a cross-sectional analysis using NHANES 2007–2018 data
Source: HighWire-hosted journal article supplement (doi:10.1136/bmjdrc-2022-003205), 2023-05-01
Supplement: bmjdrc-2022-003205supp001_data_supplement.pdf [file bmjdrc-2022-003205supp001_data_supplement.pdf]

## Supplemental Material

Table S1: Glycemic control among individuals reporting Hispanic ethnicity stratified by reported ethnicity and country of birth in a sample of adults with diabetes and income  $\leq$  185% FPL NHANES 2007-2018

| Variables                        | Uncontrolled HbA <sub>1c</sub> |            |         |  | Controlled HbA <sub>1c</sub> |            |         | p-value |
|----------------------------------|--------------------------------|------------|---------|--|------------------------------|------------|---------|---------|
|                                  | Sample N                       | Weighted N | Percent |  | Sample N                     | Weighted N | Percent |         |
| <b>Ethnicity</b>                 |                                |            |         |  |                              |            |         | 0.7103  |
| Mexican American                 | 171                            | 585954     | 62.78   |  | 276                          | 833615     | 64.09   |         |
| Other Hispanic                   | 103                            | 347372     | 37.22   |  | 176                          | 467059     | 35.91   |         |
| <b>Country of birth</b>          |                                |            |         |  |                              |            |         | 0.8457  |
| Born in the 50 US states/DC      | 71                             | 264610     | 28.35   |  | 134                          | 379121     | 29.15   |         |
| Born outside the 50 US states/DC | 203                            | 668716     | 71.65   |  | 318                          | 921553     | 70.85   |         |

Table S2: Interaction terms between food insecurity and SNAP participation, diabetes management strategy, and health insurance status explored in association with outcome of uncontrolled HbA1c in a sample of adults with diabetes and income  $\leq$  185% FPL NHANES 2007-2018

|                                                                  |         |
|------------------------------------------------------------------|---------|
| <b>Model 1: Food insecurity and SNAP participation</b>           | p-value |
| Food insecurity                                                  | 0.0317  |
| SNAP participation                                               | 0.3156  |
| Food security*SNAP participation                                 | 0.5778  |
|                                                                  |         |
| <b>Model 2: Food insecurity and diabetes management strategy</b> | p-value |
| Food insecurity                                                  | 0.0348  |
| Diabetes management strategy                                     | <.0001  |
| Food security*diabetes management strategy                       | 0.3117  |
|                                                                  |         |
| <b>Model 3: Food insecurity and health insurance status</b>      | p-value |
| Food insecurity                                                  | 0.0358  |
| Health insurance                                                 | <.0001  |
| Food security* health insurance                                  | 0.0904  |
